# Supplementary material for: Layered methylhydrazinium lead halide perovskites: new crystal polymorphs with a tailored band gap and photoluminescence colour via halide substitution
Source: Royal Society of Chemistry journal article supplement (doi:10.1039/d4tc00865k), 2024-01-01
Supplement: d4tc00865k1.pdf [file d4tc00865k1.pdf]

Electronic Supporting Information (ESI) for:

**Layered methylhydrazinium lead halide perovskites: new  
crystal polymorphs with tailored band gap and  
photoluminescence emission colour via halide substitution**

Authors: Dawid Drozdowski,<sup>\*,a</sup> Adam Kabański,<sup>a</sup> Dagmara Stefańska,<sup>a</sup> Maciej Ptak,<sup>a</sup>

Mirosław Mączka<sup>a</sup> and Anna Gągor<sup>\*,a</sup>

*<sup>a</sup>Institute of Low Temperature and Structure Research, Polish Academy of Sciences, ul. Okólna 2,  
50-422 Wrocław, Poland*

\* - Corresponding Authors; e-mails: d.drozdowski@intibs.pl, a.gagor@intibs.pl

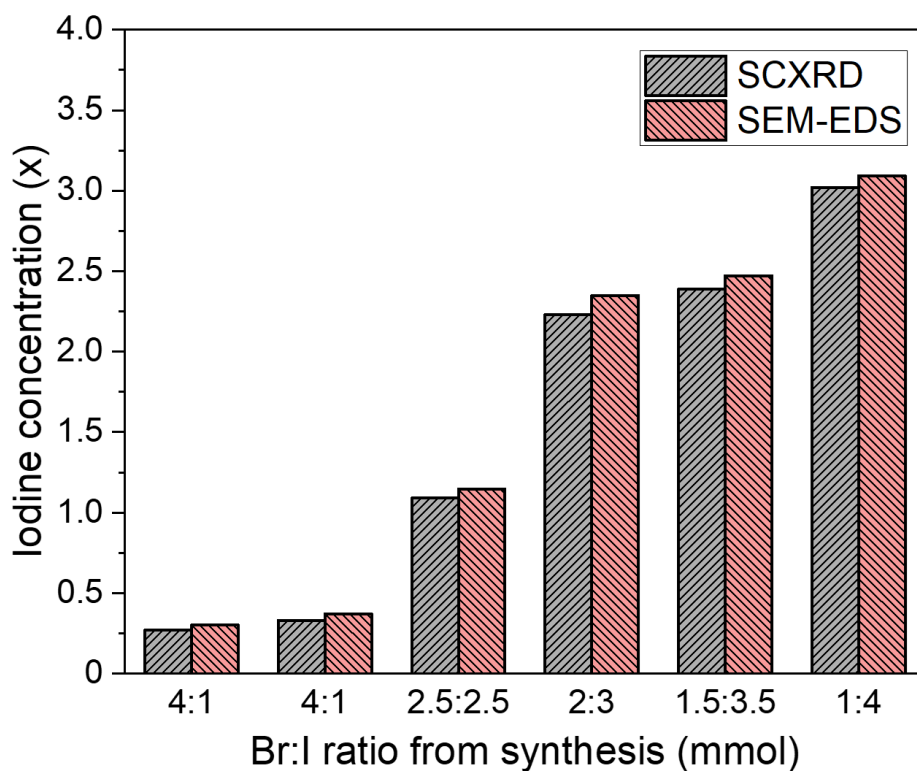

**Figure S1.** Comparison of the iodine contribution ( $x$ ) calculated via elemental analysis (Scanning Electron Microscope with Energy Dispersive Spectrometer – SEM-EDS) and refined based on single-crystal X-ray diffraction data (site occupancy factors of halides refined as free parameters).

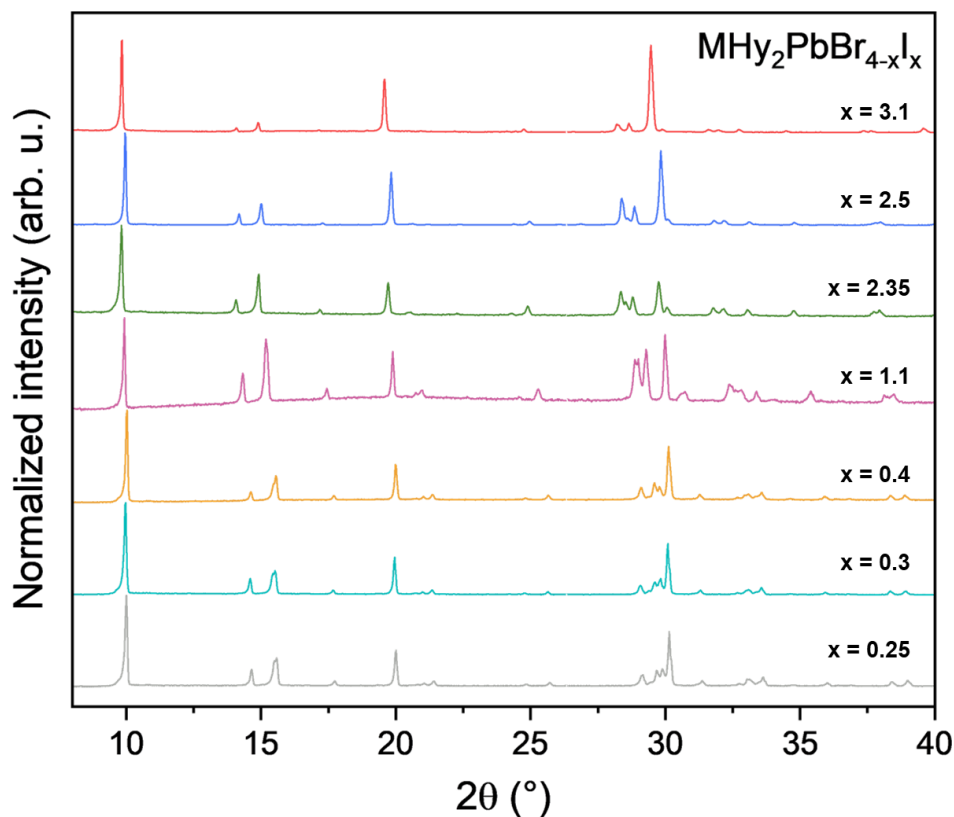

**Figure S2.** Powder X-ray diffraction patterns for MHy<sub>2</sub>PbBr<sub>4-x</sub>I<sub>x</sub> at 295 K testifying phase purity.

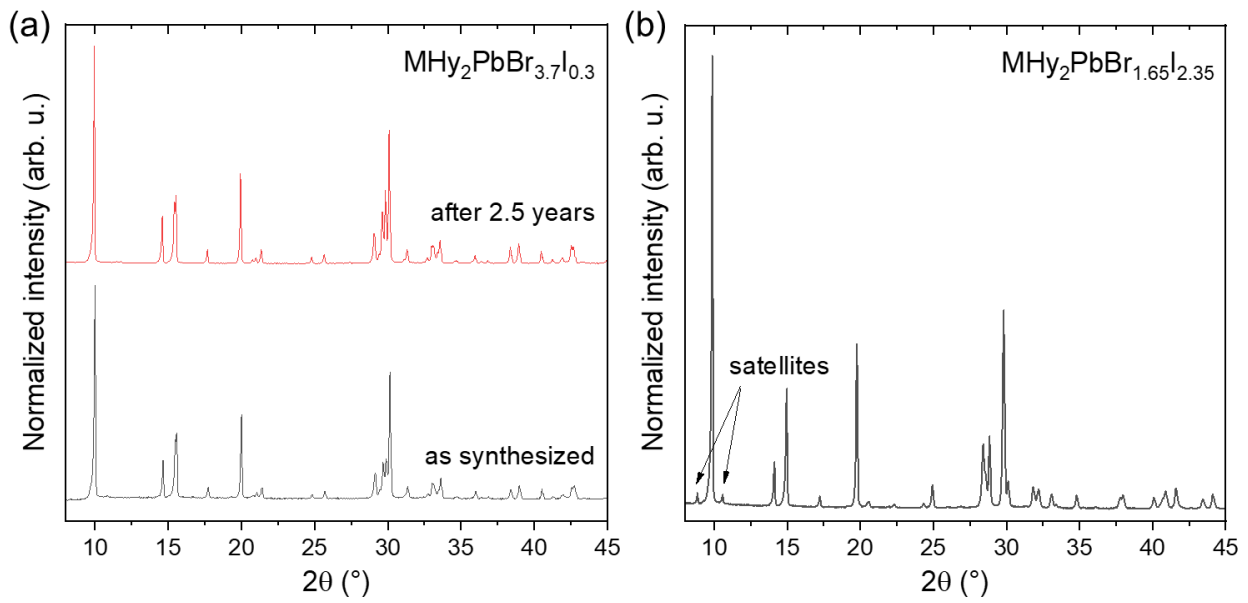

**Figure S3.** (a) The comparison of PXRD patterns for  $\text{MHyPbBr}_{3.7}\text{I}_{0.3}$  (as-synthesized sample and stored *ca.* 2.5 years in a desiccator, RT) and (b) patterns for  $\text{MHyPbBr}_{1.65}\text{I}_{2.35}$  (stored *ca.* 2.5 years in a desiccator, RT).

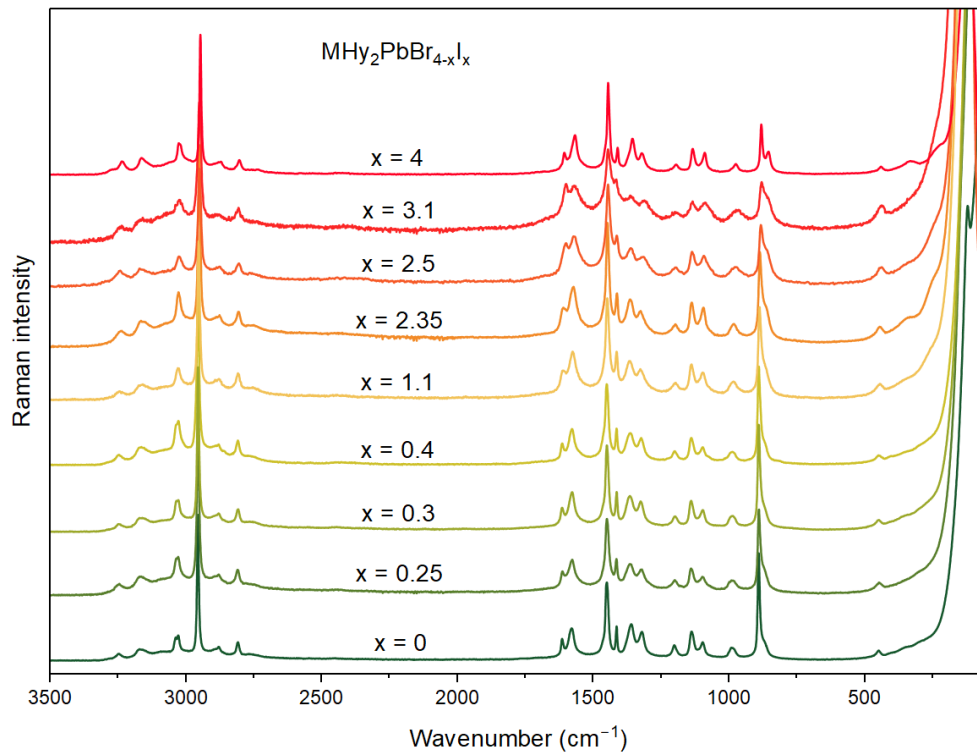

**Figure S4.** Raman spectra of polycrystalline  $\text{MHy}_2\text{PbBr}_{4-x}\text{I}_x$  samples.

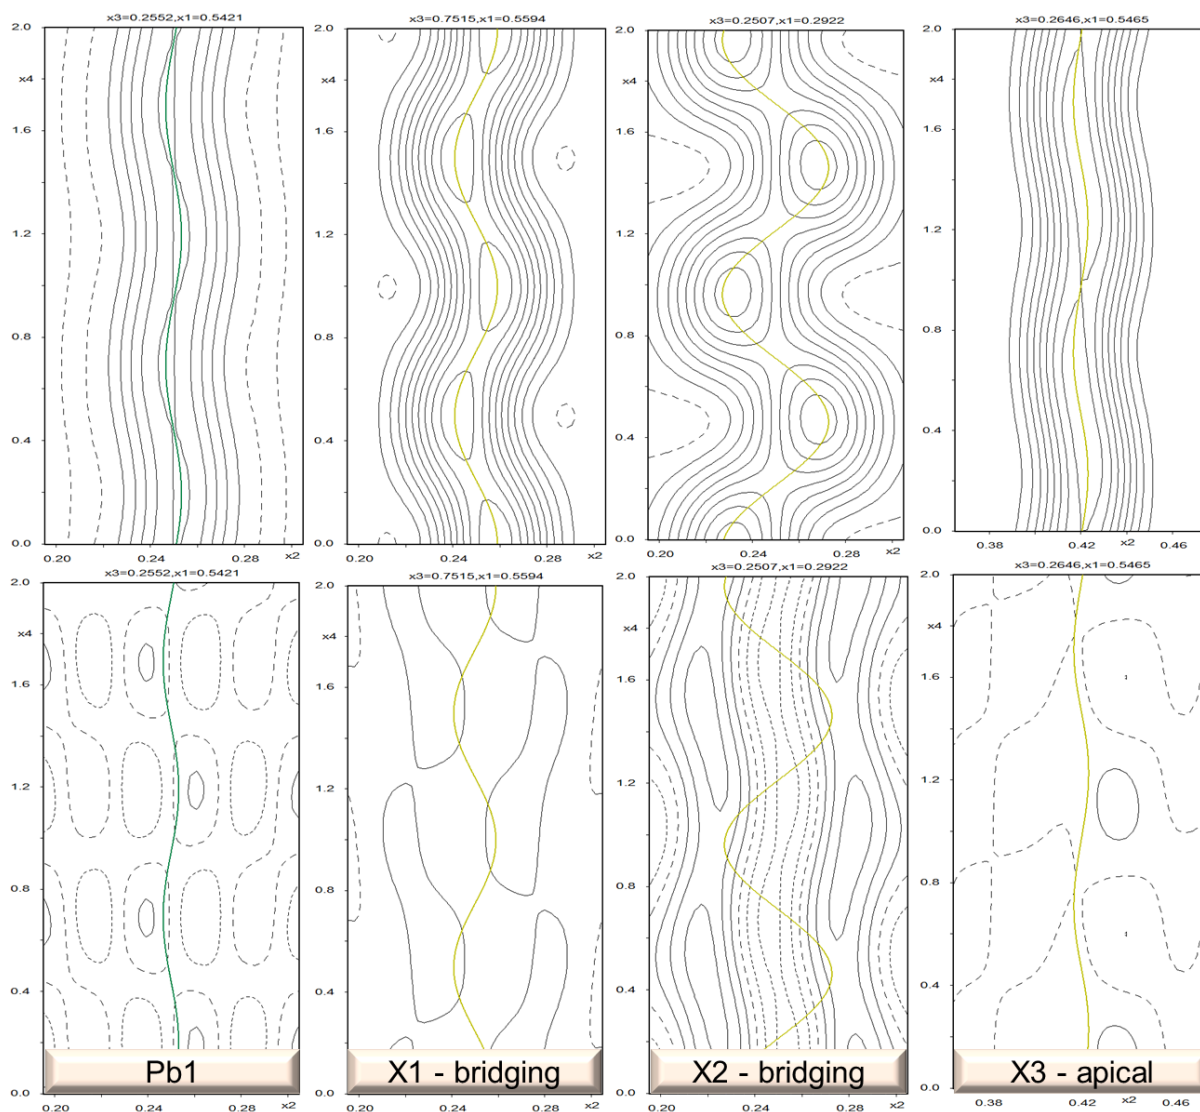

**Figure S5.** The  $x_1$ - $x_4$  sections through Pb and three inequivalent X atoms ( $X = \text{Br}, \text{I}$ ) in  $\text{MHy}_2\text{PbBr}_{0.9}\text{I}_{3.1}$  in modulated phase **VI**. Upper part: observed Fourier maps with contour step of  $20 \text{ e}\text{\AA}^{-3}$  for Pb and  $5 \text{ e}\text{\AA}^{-3}$  for X. Lower part: difference maps with the contour step of  $0.5 \text{ e}\text{\AA}^{-3}$  for all atoms. The dashed lines represent negative densities.

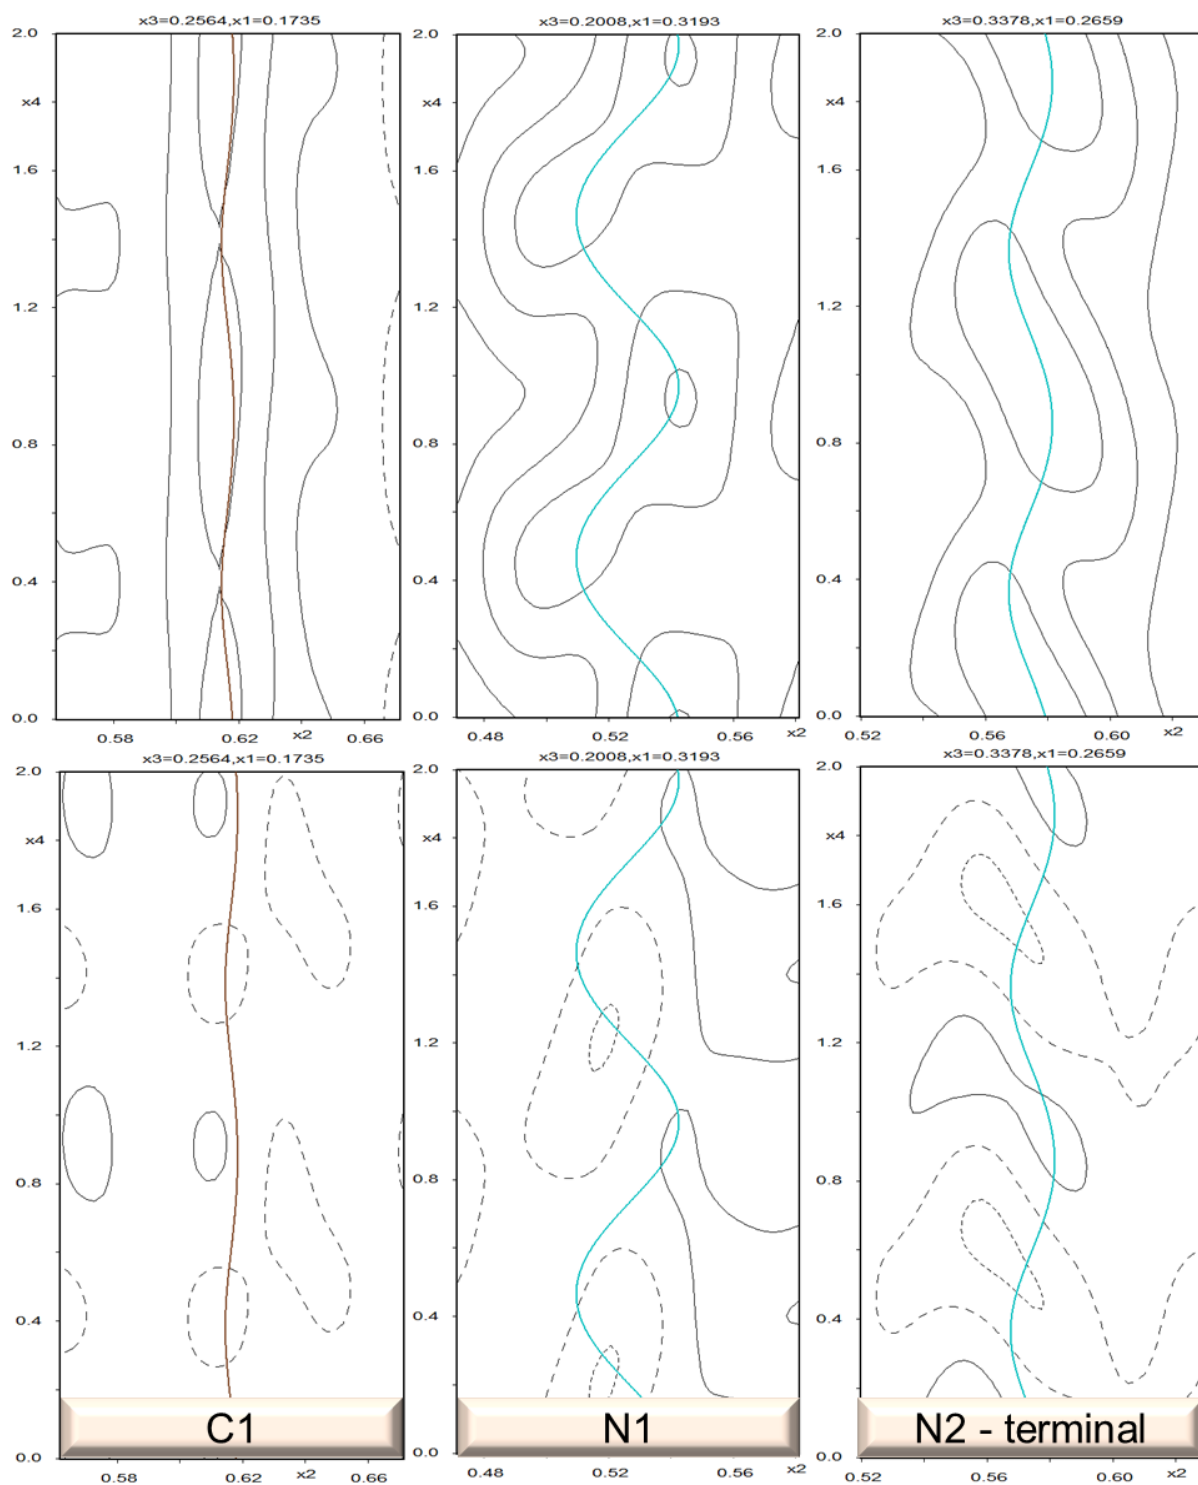

**Figure S6.** The  $x_1$ - $x_4$  sections through the atoms of  $\text{MHy}^+$  in  $\text{MHy}_2\text{PbBr}_{0.9}\text{I}_{3.1}$  in modulated phase VI. Upper part: observed Fourier maps with contour step of  $1 \text{ e}\text{\AA}^{-3}$  for all atoms. Lower part: difference maps with the contour step of  $0.5 \text{ e}\text{\AA}^{-3}$  for all atoms. The dashed lines represent negative densities.

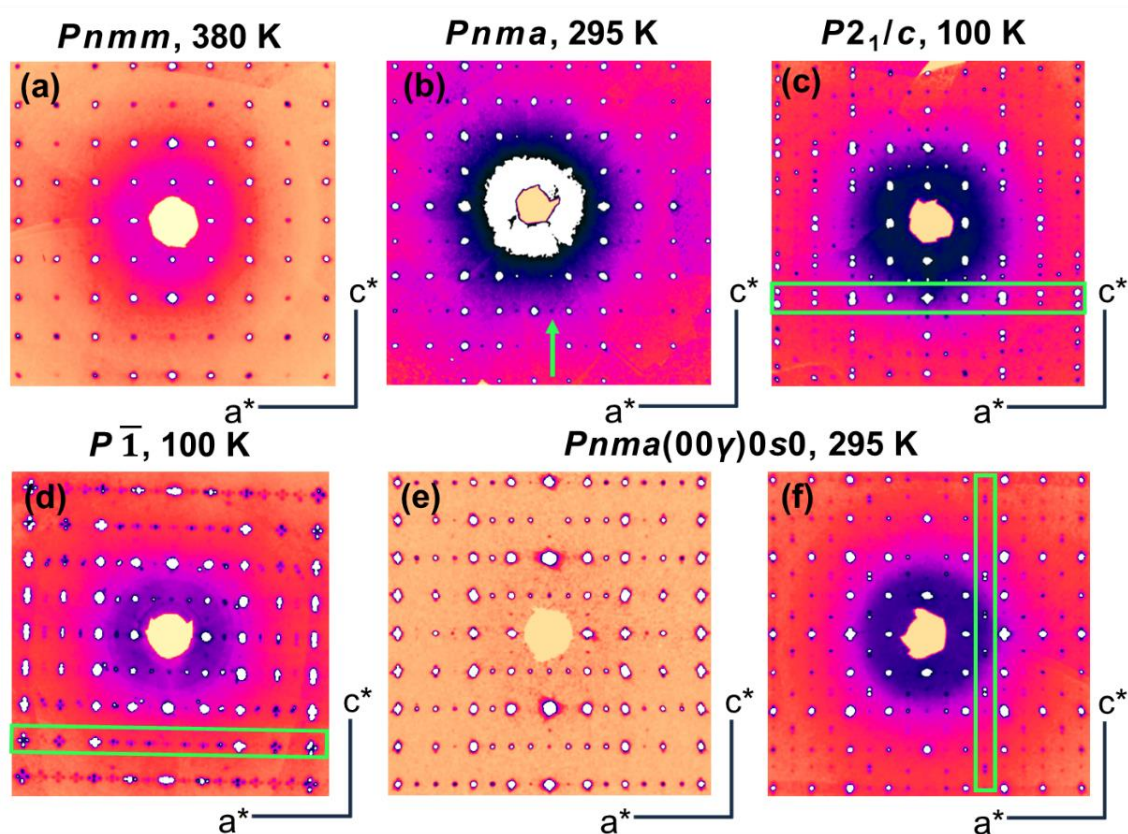

**Figure S7.** Reciprocal space reconstruction of the (a-d)  $h0l$  layer in particular phases: (a, b, c)  $Pnmm$ ,  $Pnma$  and  $P2_1/c$  (**II**, **III** and **IV**, respectively), (d)  $P\bar{1}$  (**V**). (e-f) To apply the systematic extinctions rule for satellite reflections in modulated phase, four integers  $hklm$  ( $ha^* + kb^* + lc^* + mq$ ) are provided to index all peaks. For (e)  $h0lm$  layer, the 1<sup>st</sup> order satellite reflections ( $m = 1$ ) do not appear, while for (f)  $h1lm$  layer are visible. According to the *International Tables for Crystallography Volume C* (Janssen *et al.*, 2006) this rule applies to an intrinsic shift  $s$  along the  $[010]$  direction. Therefore, the (3+1)-dimensional superspace group is  $Pnma(00\gamma)0s0$  (**VI**).



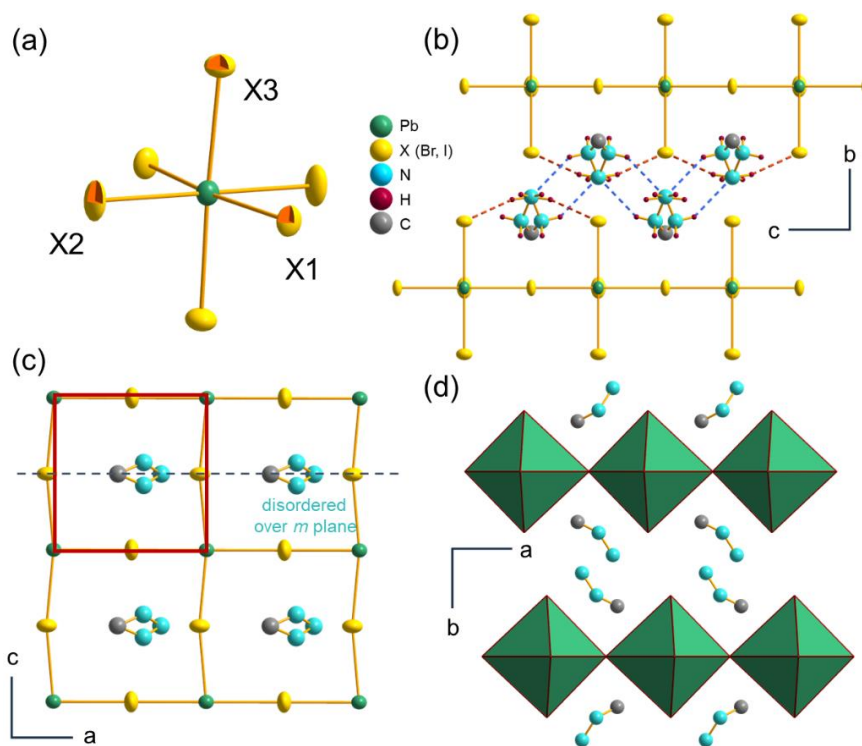

**Figure S8.** Crystal structure of  $\text{MHy}_2\text{PbBr}_{3.7}\text{I}_{0.3}$  (1<sup>st</sup> region) in **II** at 380 K. (a) Individual octahedra with three independent halides. View along (b) [100], (c) [010] and (d) [001] direction. Dashed lines in (b) represent possible hydrogen bonding (HBs) interactions.

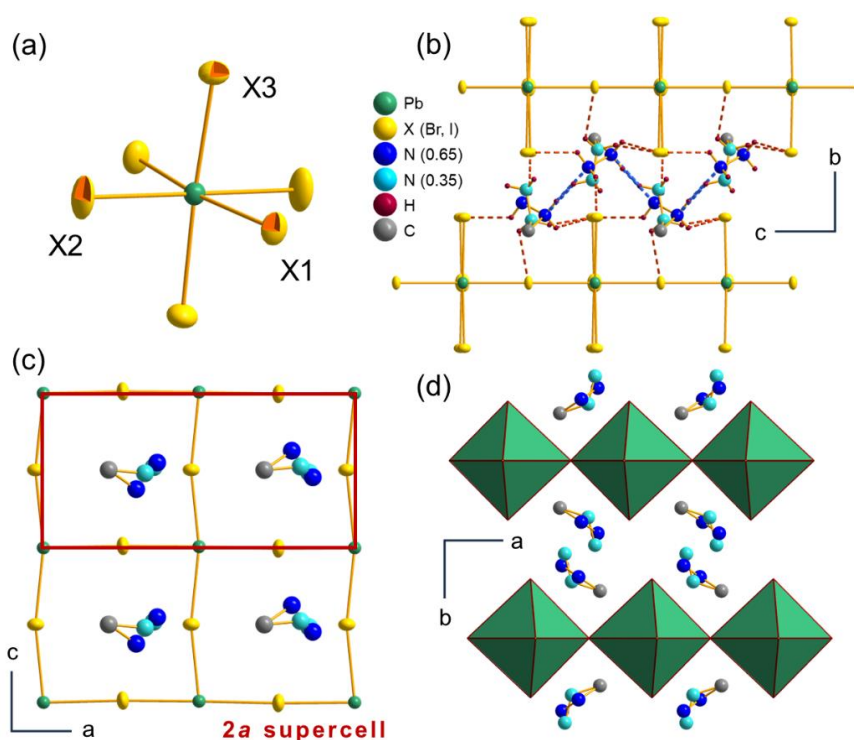

**Figure S9.** Crystal structure of  $\text{MHy}_2\text{PbBr}_{3.7}\text{I}_{0.3}$  (1<sup>st</sup> region) in **III** at 295 K. (a) Individual octahedra with three independent halides. View along (b) [100], (c) [010] and (d) [001] direction. Dashed lines in (b) represent possible HBs.

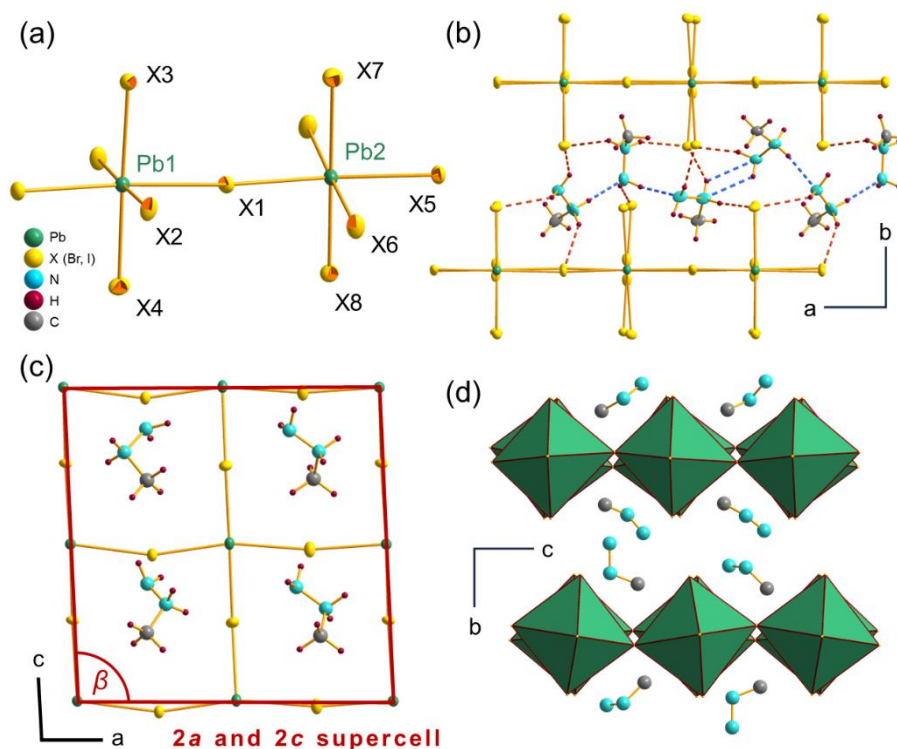

**Figure S10.** Crystal structure of  $\text{MHy}_2\text{PbBr}_{3.7}\text{I}_{0.3}$  (1<sup>st</sup> region) in IV at 100 K. (a) Two  $[\text{PbX}_6]^{4-}$  octahedra in the asymmetric unit. View along (b) [001], (c) [010] and (d) [100] direction. Dashed lines in (b) represent possible HBs.

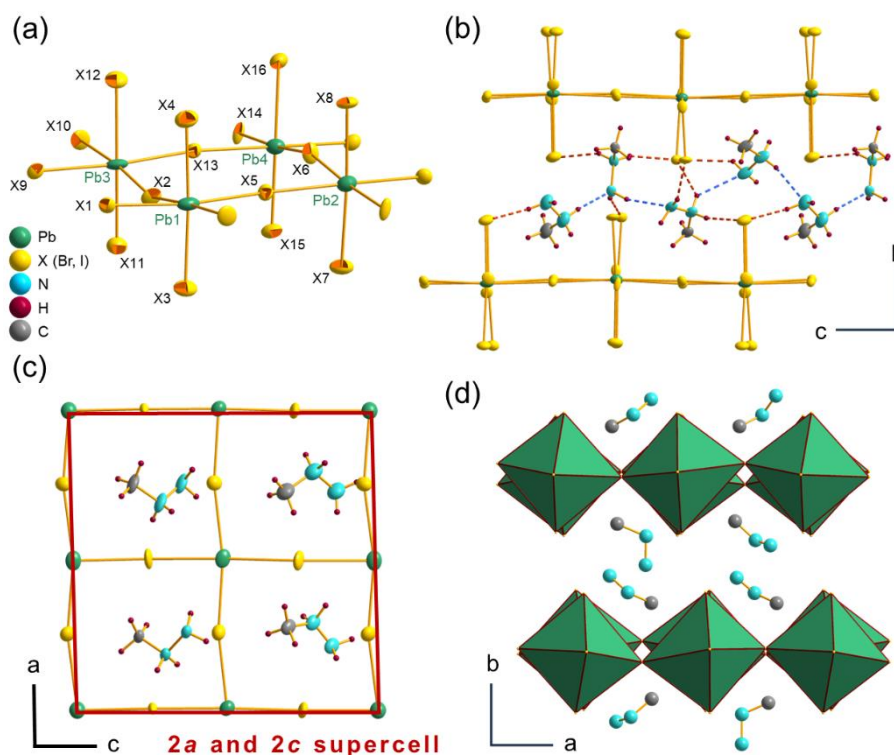

**Figure S11.** Crystal structure of  $\text{MHy}_2\text{PbBr}_{2.9}\text{I}_{1.1}$  (2<sup>nd</sup> region) in V at 100 K. (a) Four  $[\text{PbX}_6]^{4-}$  octahedra in the asymmetric unit. View along (b) [100], (c) [010] and (d) [001] direction. Dashed lines in (b) represent possible HBs.



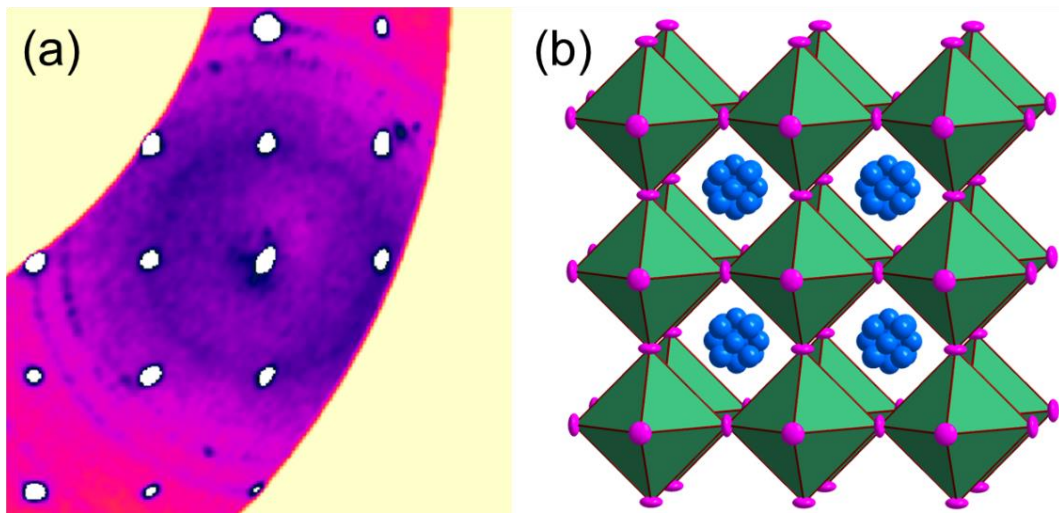

**Figure S12.** (a) Reciprocal space reconstruction and (b) crystal structure of  $\text{MHy}_2\text{PbBr}_{1.5}\text{I}_{2.5}$  in  $Pm\bar{3}m$  (I) at 350 K. Measured after pre-heating to 370 K.

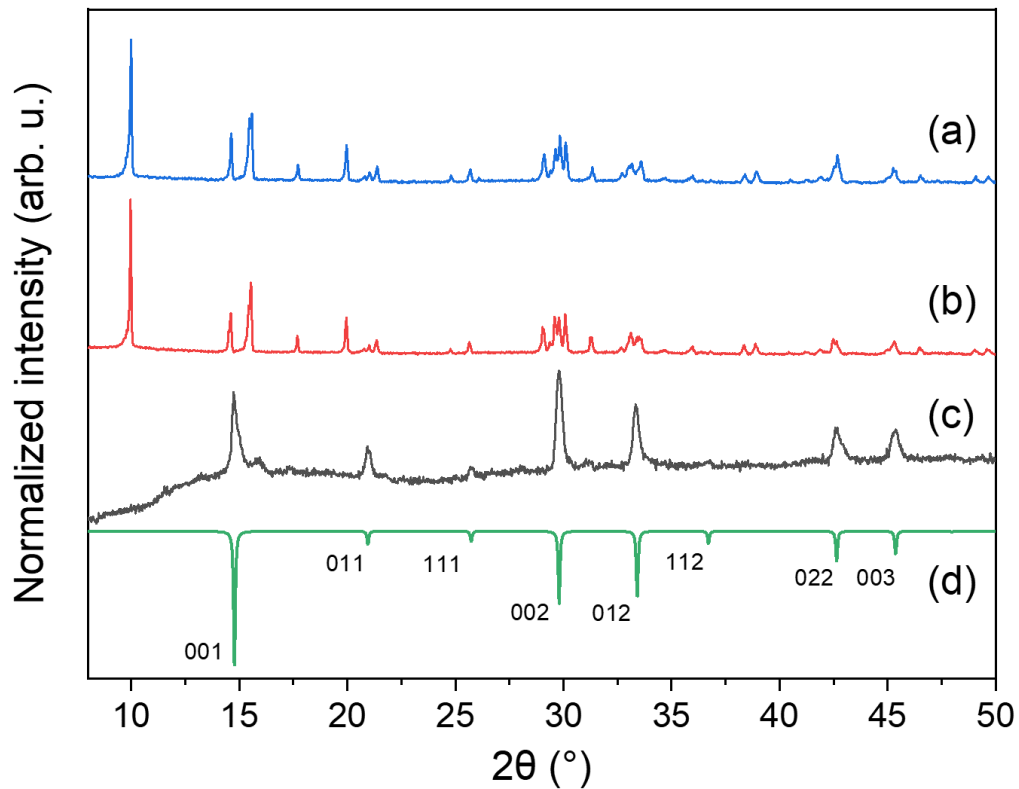

**Figure S13.** (a-c) Experimental powder XRD diffractograms of  $\text{MHy}_2\text{PbBr}_{3.7}\text{I}_{0.3}$  (a) at RT ( $Pnma$ , III), (b) at RT after heating at 375 K (III), (c) at RT after heating at 420 K ( $Pm\bar{3}m$ , I). (d) Theoretical diffractogram for phase I with  $a = 5.992(3)$  Å.

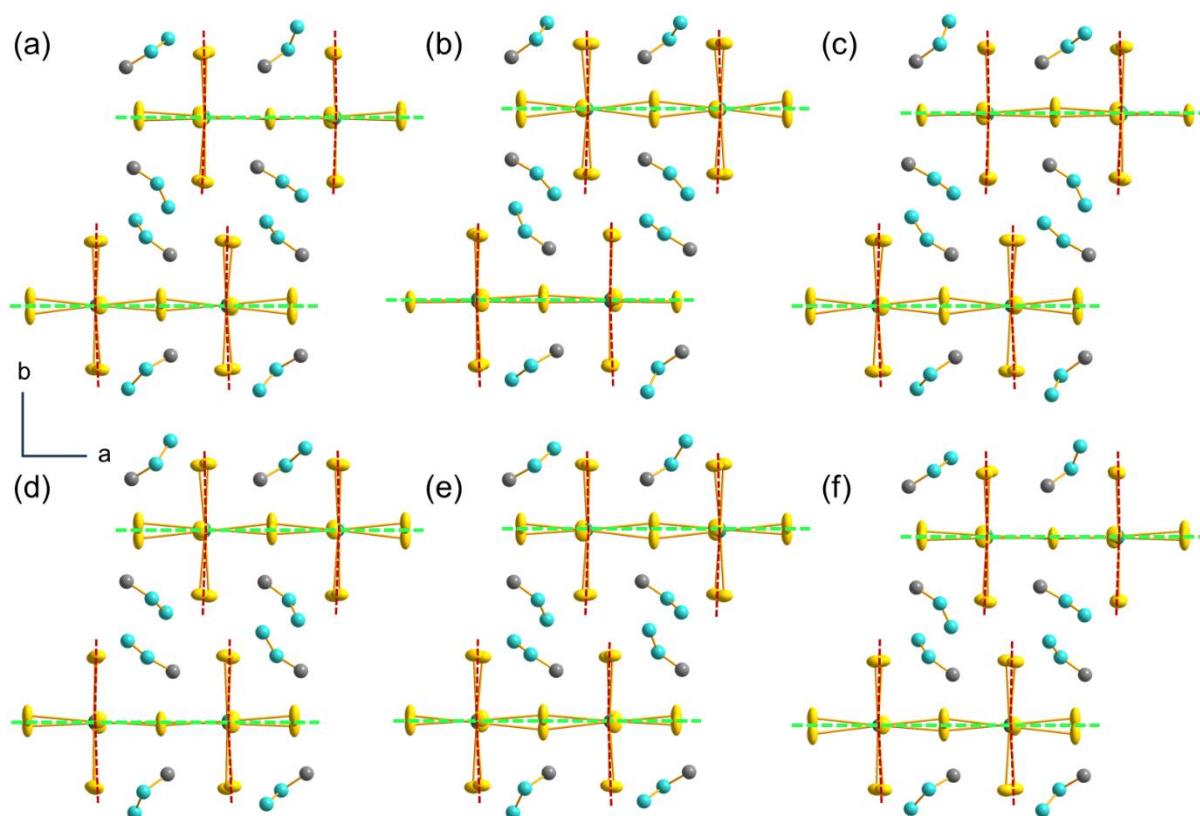

**Figure S14.** Snapshots of the modulation in phase VI in  $\text{MHy}_2\text{PbBr}_{0.9}\text{I}_{3.1}$  at 295 K for  $t$  values equal to (a) 0, (b) 0.2, (c) 0.4, (d) 0.6, (e) 0.8 and (f) 1.0 Dashed lines represent coordinates of X1 (green) and X3 (red) in the averaged structure.

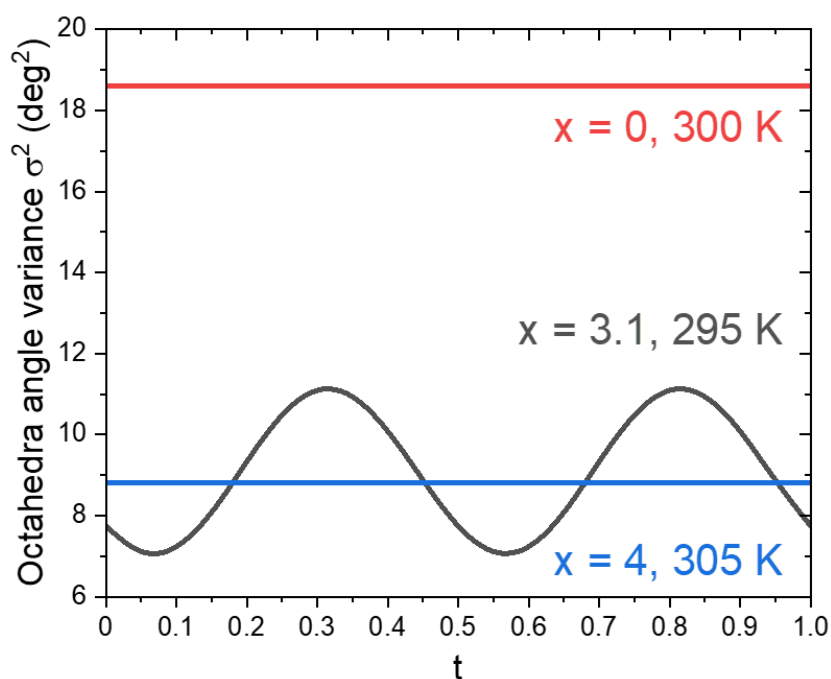

**Figure S15.** Octahedra angle variance  $\sigma^2$  of  $\text{MHy}_2\text{PbBr}_{0.9}\text{I}_{3.1}$  in modulated phase (VI) at 295 K versus  $t$ , compared with single halide analogues –  $\text{MHy}_2\text{PbBr}_4$  ( $Pmn2_1$ , 300 K) and  $\text{MHy}_2\text{PbI}_4$  ( $Pmnm$ , 305 K).

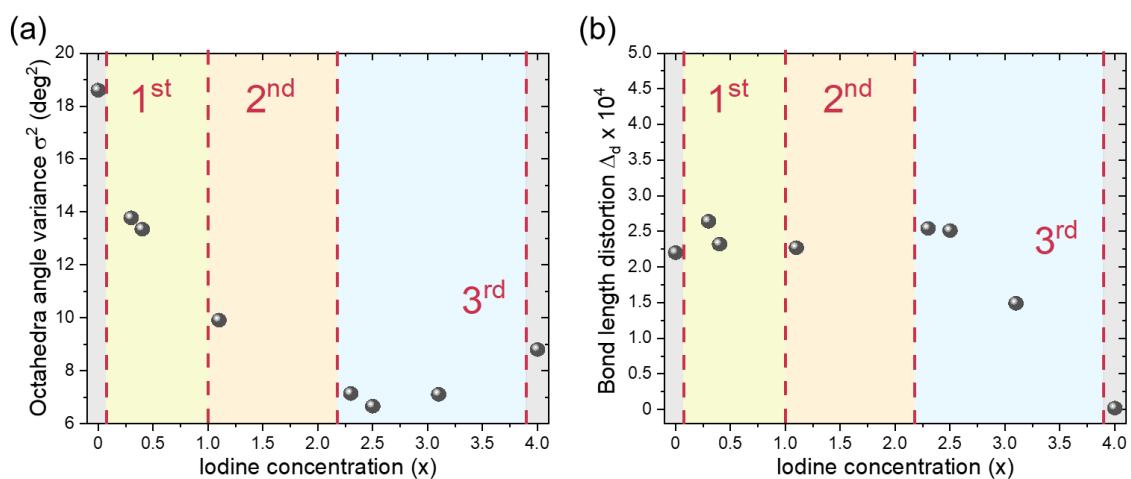

**Figure S16.** Octahedra distortion parameters of  $\text{MHy}_2\text{PbBr}_{4-x}\text{I}_x$  versus iodine concentration ( $x$ ): (a) bond length distortion ( $\Delta_d$ ) and (b) octahedra angle variance ( $\sigma^2$ ). Values for the samples in the 3<sup>rd</sup> region are provided for the averaged structure of **VI**.

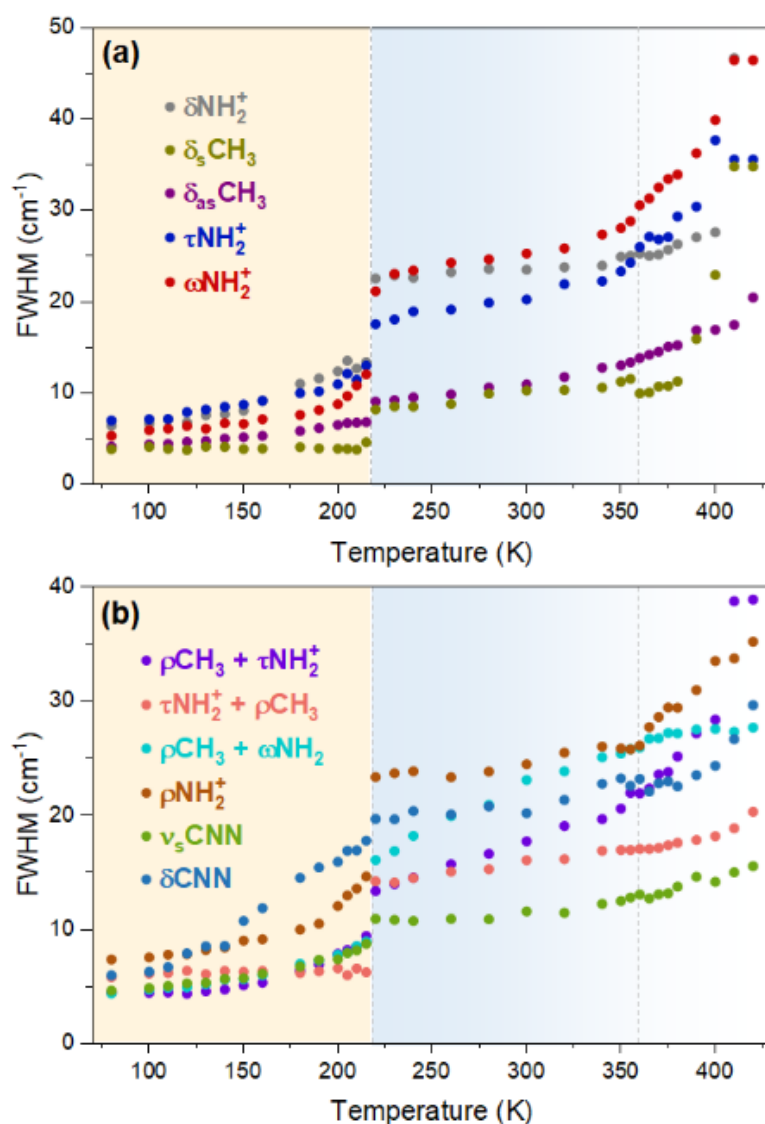

**Figure S17.** Dependences of FWHMs of selected Raman bands as a function of temperature for the  $\text{MHy}_2\text{PbBr}_{3.7}\text{I}_{0.3}$  sample.

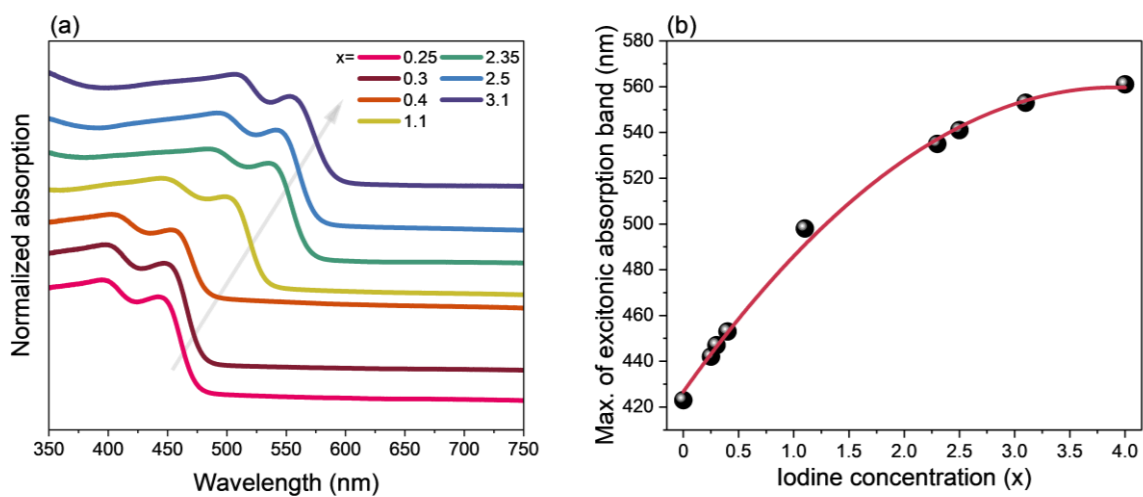

**Figure S18.** (a) Room temperature absorption spectra and (b) position of the maximum of the excitonic absorption band consolidated with the 2<sup>nd</sup>-order polynomial fitting (red curve) of the investigated samples of MHy<sub>2</sub>PbBr<sub>4-x</sub>I<sub>x</sub>.

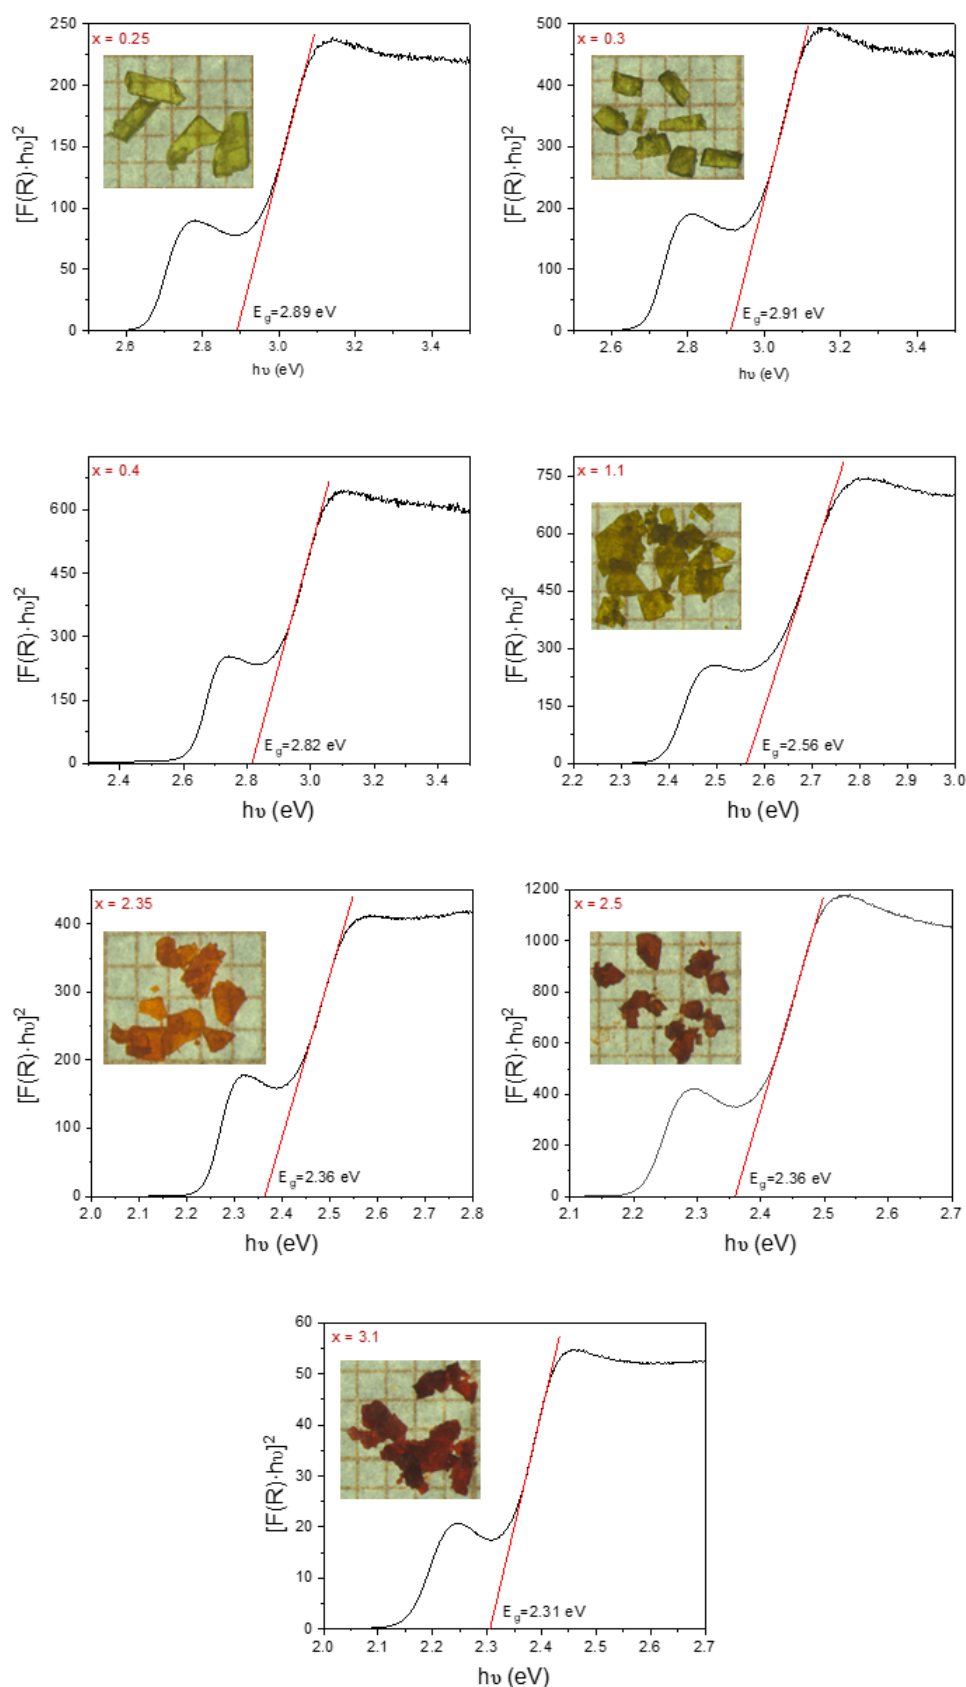

**Figure S19.** The energy of band gaps determined with Tauc plots for investigated materials of  $\text{MHy}_2\text{PbBr}_{4-x}\text{I}_x$ . The composition of the individual material is presented in the plot. The insets represent the actual samples, placed on a graph paper (1 grid = 1 mm).

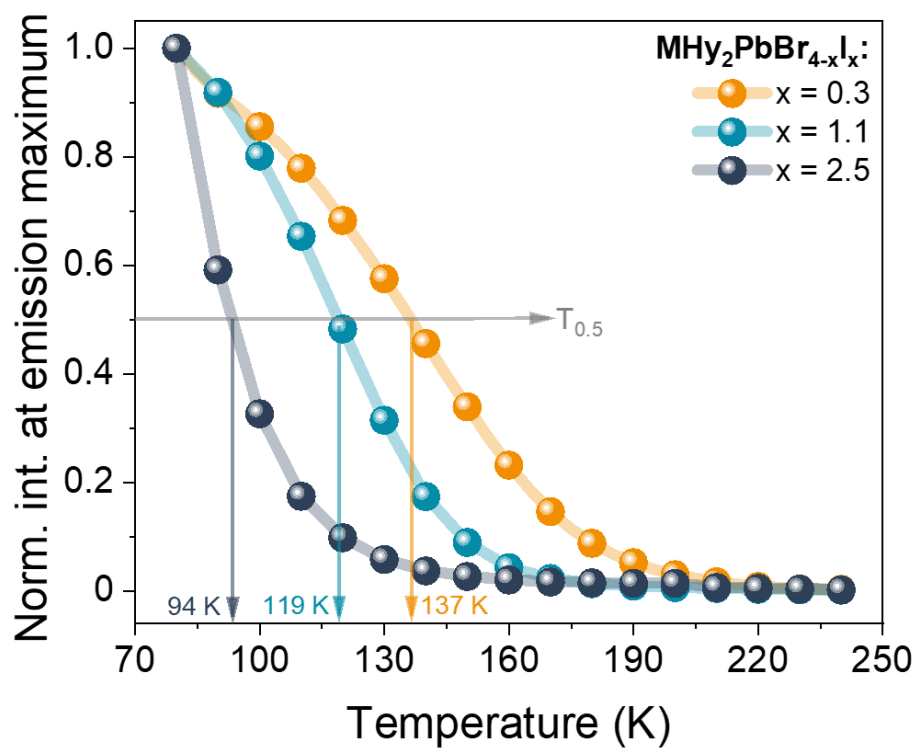

**Figure S20.** The influence of temperature on normalized integrated PL intensities.



**Table S1.** Experimental and refinement details of  $\text{MHy}_2\text{PbBr}_{3.7}\text{I}_{0.3}$  ( $M_r = 635.08$ ).

|                                                                                                                | <b>Phase II</b>               | <b>Phase III</b>               | <b>Phase IV</b>                     |
|----------------------------------------------------------------------------------------------------------------|-------------------------------|--------------------------------|-------------------------------------|
| <b>Crystal data</b>                                                                                            |                               |                                |                                     |
| Crystal system, space group                                                                                    | Orthorhombic, <i>Pnmm</i>     | Orthorhombic, <i>Pnma</i>      | Monoclinic, <i>P2<sub>1</sub>/c</i> |
| Temperature (K)                                                                                                | 380                           | 295                            | 100                                 |
| <i>a</i> , <i>b</i> , <i>c</i> (Å)                                                                             | 6.097(3), 18.194(3), 6.063(5) | 12.205(4), 17.858(5), 6.054(3) | 12.120(4), 17.609(5), 12.099(3)     |
| $\beta$ (°)                                                                                                    | 90, 90, 90                    | 90, 90, 90                     | 90, 92.52(3), 90                    |
| <i>V</i> (Å <sup>3</sup> )                                                                                     | 672.5(7)                      | 1319.7(9)                      | 2579.6(13)                          |
| <i>Z</i>                                                                                                       | 2                             | 4                              | 8                                   |
| $\mu$ (mm <sup>-1</sup> )                                                                                      | 24.18                         | 24.68                          | 25.25                               |
| Crystal size (mm)                                                                                              | 0.16 × 0.12 × 0.03            | 0.16 × 0.12 × 0.03             | 0.16 × 0.12 × 0.03                  |
| <b>Data collection</b>                                                                                         |                               |                                |                                     |
| <i>T</i> <sub>min</sub> , <i>T</i> <sub>max</sub>                                                              | 0.109, 1.000                  | 0.240, 1.000                   | 0.240, 1.000                        |
| No. of measured, independent and observed [ <i>I</i> > 2σ( <i>I</i> )] reflections                             | 14587, 735, 702               | 20001, 1394, 940               | 8313, 8313, 4120                    |
| <i>R</i> <sub>int</sub>                                                                                        | 0.044                         | 0.042                          | -                                   |
| (sin $\theta/\lambda$ ) <sub>max</sub> (Å <sup>-1</sup> )                                                      | 0.609                         | 0.625                          | 0.610                               |
| <b>Refinement</b>                                                                                              |                               |                                |                                     |
| <i>R</i> [ <i>F</i> <sup>2</sup> > 2σ( <i>F</i> <sup>2</sup> )], <i>wR</i> ( <i>F</i> <sup>2</sup> ), <i>S</i> | 0.034, 0.097, 1.24            | 0.026, 0.069, 1.05             | 0.048, 0.126, 0.89                  |
| No. of reflections                                                                                             | 735                           | 1394                           | 8313                                |
| No. of parameters                                                                                              | 40                            | 60                             | 160                                 |
| No. of restraints                                                                                              | 0                             | 2                              | 1                                   |
| $\Delta\rho_{\text{max}}$ , $\Delta\rho_{\text{min}}$ (e Å <sup>-3</sup> )                                     | 1.62, -1.35                   | 0.63, -0.86                    | 2.86, -2.67                         |

**Table S2.** Experimental and refinement details of  $\text{MHy}_2\text{PbBr}_{2.9}\text{I}_{1.1}$  ( $M_r = 672.68$ ).

|                                                                                                                | <b>Phase III</b>               | <b>Phase V</b>                  |
|----------------------------------------------------------------------------------------------------------------|--------------------------------|---------------------------------|
| <b>Crystal data</b>                                                                                            |                                |                                 |
| Crystal system, space group                                                                                    | Orthorhombic, <i>Pnma</i>      | Triclinic, <i>P-1</i>           |
| Temperature (K)                                                                                                | 295                            | 100                             |
| <i>a</i> , <i>b</i> , <i>c</i> (Å)                                                                             | 12.391(4), 17.892(5), 6.166(3) | 12.318(4), 17.655(5), 12.297(4) |
| $\beta$ (°)                                                                                                    | 90, 90, 90                     | 90.04(3), 88.85(3), 89.98(3)    |
| <i>V</i> (Å <sup>3</sup> )                                                                                     | 1366.9(9)                      | 2673.6(14)                      |
| <i>Z</i>                                                                                                       | 4                              | 8                               |
| $\mu$ (mm <sup>-1</sup> )                                                                                      | 23.27                          | 23.92                           |
| Crystal size (mm)                                                                                              | 0.28 × 0.18 × 0.07             | 0.28 × 0.18 × 0.07              |
| <b>Data collection</b>                                                                                         |                                |                                 |
| <i>T</i> <sub>min</sub> , <i>T</i> <sub>max</sub>                                                              | 0.346, 1.000                   | 0.159, 1.000                    |
| No. of measured, independent and observed [ <i>I</i> > 2σ( <i>I</i> )] reflections                             | 8147, 1444, 846                | 11196, 11196, 5598              |
| <i>R</i> <sub>int</sub>                                                                                        | 0.040                          | -                               |
| (sin $\theta/\lambda$ ) <sub>max</sub> (Å <sup>-1</sup> )                                                      | 0.625                          | 0.610                           |
| <b>Refinement</b>                                                                                              |                                |                                 |
| <i>R</i> [ <i>F</i> <sup>2</sup> > 2σ( <i>F</i> <sup>2</sup> )], <i>wR</i> ( <i>F</i> <sup>2</sup> ), <i>S</i> | 0.032, 0.073, 1.03             | 0.107, 0.314, 1.01              |
| No. of reflections                                                                                             | 1444                           | 11196                           |
| No. of parameters                                                                                              | 61                             | 318                             |
| No. of restraints                                                                                              | 2                              | 85                              |
| $\Delta\rho_{\text{max}}$ , $\Delta\rho_{\text{min}}$ (e Å <sup>-3</sup> )                                     | 0.86, -1.52                    | 12.55, -5.90                    |

**Table S3.** Experimental and refinement details of compounds crystallizing in modulated phase (VI):  $\text{MHy}_2\text{PbBr}_{1.65}\text{I}_{2.35}$  ( $M_r = 731.43$ ),  $\text{MHy}_2\text{PbBr}_{1.5}\text{I}_{2.5}$  ( $M_r = 738.48$ ),  $\text{MHy}_2\text{PbBr}_{0.9}\text{I}_{3.1}$  ( $M_r = 766.68$ ) and for  $\text{MHy}_2\text{PbBr}_{1.5}\text{I}_{2.5}$  in phase I. For the first two compounds values are provided for averaged structures.

|                                                                         | $\text{MHy}_2\text{PbBr}_{1.65}\text{I}_{2.35}$ | $\text{MHy}_2\text{PbBr}_{1.5}\text{I}_{2.5}$ | $\text{MHy}_2\text{PbBr}_{0.9}\text{I}_{3.1}$ | $\text{MHy}_2\text{PbBr}_{1.5}\text{I}_{2.5}$ |
|-------------------------------------------------------------------------|-------------------------------------------------|-----------------------------------------------|-----------------------------------------------|-----------------------------------------------|
| <b>Crystal data</b>                                                     |                                                 |                                               |                                               |                                               |
| Crystal system, space group                                             | Orthorhombic, $Pnma(00\gamma)s00$               |                                               |                                               | Cubic, $Pm-3m$                                |
| Modulation vector, $q$                                                  | 0.456c*                                         | 0.454c*                                       | 0.440c*                                       | -                                             |
| Temperature (K)                                                         | 295                                             |                                               |                                               | 350                                           |
| $a, b, c$ (Å)                                                           | 12.600(4),<br>18.024(5), 6.303(3)               | 12.642(4),<br>18.070(5), 6.330(3)             | 12.710(4),<br>18.271(5), 6.363(3)             | 6.270(3)                                      |
| $V$ (Å <sup>3</sup> )                                                   | 1431.5(9)                                       | 1319.7(9)                                     | 1477.7(9)                                     | 246.4(4)                                      |
| $Z$                                                                     | 4                                               |                                               |                                               | 1                                             |
| $\mu$ (mm <sup>-1</sup> )                                               | 21.50                                           | 21.18                                         | 20.30                                         | 26.43                                         |
| Crystal size (mm)                                                       | 0.2 × 0.08 × 0.03                               | 0.25 × 0.13 × 0.03                            | 0.3 × 0.14 × 0.07                             | 0.25 × 0.13 × 0.03                            |
| <b>Data collection</b>                                                  |                                                 |                                               |                                               |                                               |
| $T_{\min}, T_{\max}$                                                    | 0.294, 1.000                                    | 0.187, 1.000                                  | 0.473, 1.000                                  | 0.418, 1.000                                  |
| No. of measured, independent and observed reflections                   | 27011, 1509, 1101                               | 54228, 1523, 1111                             | 183735, 5912, 2458                            | 551, 76, 63                                   |
| $R_{\text{int}}$                                                        | 0.038                                           | 0.049                                         | 0.060                                         | 0.053                                         |
| $(\sin \theta/\lambda)_{\text{max}}$ (Å <sup>-1</sup> )                 | 0.624                                           | 0.625                                         | 0.695                                         | 0.623                                         |
| <b>Refinement</b>                                                       |                                                 |                                               |                                               |                                               |
| $R[F^2 > 2\sigma(F^2)],$<br>$wR(F^2),$<br>$S$ (all)                     | 0.041, 0.124, 1.10                              | 0.047, 0.146, 1.13                            | 0.059, 0.222, 2.32                            | 0.050, 0.123, 1.08                            |
| $R[F^2 > 2\sigma(F^2)],$<br>$wR(F^2)$ (main)                            | -                                               | -                                             | 0.039, 0.124                                  | -                                             |
| $R[F^2 > 2\sigma(F^2)],$<br>$wR(F^2)$ (satellites)                      | -                                               | -                                             | 0.128, 0.286                                  | -                                             |
| No. of reflections                                                      | 1509                                            | 1523                                          | 5912                                          | 76                                            |
| No. of parameters                                                       | 48                                              | 48                                            | 58                                            | 8                                             |
| No. of restraints                                                       | 4                                               | 4                                             | 2                                             | -                                             |
| $\Delta\rho_{\text{max}}, \Delta\rho_{\text{min}}$ (e Å <sup>-3</sup> ) | 2.42, -2.86                                     | 2.89, -3.25                                   | 1.93, -2.02                                   | 0.83, -0.54                                   |

**Table S4.** Selected hydrogen-bond parameters of MHy<sub>2</sub>PbBr<sub>3.7</sub>I<sub>0.3</sub>.

| <i>D</i> —H··· <i>A</i>       | <i>D</i> —H (Å) | H··· <i>A</i> (Å) | <i>D</i> ··· <i>A</i> (Å) | <i>D</i> —H··· <i>A</i> (°) |
|-------------------------------|-----------------|-------------------|---------------------------|-----------------------------|
| <b>Phase III, 295 K</b>       |                 |                   |                           |                             |
| N3A—H3AA···Br3 <sup>i</sup>   | 0.89            | 2.61              | 3.316 (11)                | 136.7                       |
| N3A—H3AB···Br3                | 0.89            | 2.76              | 3.534 (15)                | 146.0                       |
| N2A—H2AA···Br3 <sup>ii</sup>  | 0.89            | 2.63              | 3.289 (9)                 | 131.4                       |
| N2A—H2AB···N3A <sup>iii</sup> | 0.89            | 2.23              | 3.110 (17)                | 170.9                       |
| N2—H2A···Br1 <sup>ii</sup>    | 0.89            | 2.82              | 3.41 (3)                  | 125.1                       |
| N2—H2B···Br3 <sup>iii</sup>   | 0.89            | 2.73              | 3.531 (17)                | 150.7                       |
| N3—H3A···N3 <sup>iii</sup>    | 0.90            | 2.56              | 3.335 (19)                | 144.4                       |
| N3—H3B···N3 <sup>iv</sup>     | 0.90            | 2.49              | 3.335 (19)                | 157.1                       |
| <b>Phase IV, 100 K</b>        |                 |                   |                           |                             |
| N6—H6A···Br1 <sup>v</sup>     | 0.92            | 2.91              | 3.736 (17)                | 150.4                       |
| N6—H6B···Br8 <sup>vi</sup>    | 0.93            | 2.58              | 3.497 (17)                | 169.9                       |
| N8—H8A···Br3 <sup>i</sup>     | 0.89            | 2.86              | 3.501 (15)                | 129.6                       |
| N8—H8B···Br7                  | 0.89            | 2.68              | 3.451 (16)                | 146.1                       |
| N4—H4D···Br7 <sup>i</sup>     | 0.91            | 2.72              | 3.530 (16)                | 149.4                       |
| N4—H4E···N6                   | 0.91            | 2.26              | 3.13 (2)                  | 159.5                       |
| N3—H3D···Br7                  | 0.91            | 2.50              | 3.357 (15)                | 157.6                       |
| N3—H3E···Br3                  | 0.91            | 2.47              | 3.292 (16)                | 151.0                       |
| N1—H1A···N4                   | 0.91            | 1.98              | 2.890 (19)                | 177.9                       |
| N1—H1B···Br5 <sup>v</sup>     | 0.91            | 2.73              | 3.514 (17)                | 144.6                       |
| N1—H1B···Br8 <sup>v</sup>     | 0.91            | 2.93              | 3.407 (14)                | 114.6                       |
| N5—H5A···Br7                  | 0.91            | 2.56              | 3.325 (17)                | 142.5                       |
| N5—H5A···N8                   | 0.91            | 2.57              | 3.21 (2)                  | 127.9                       |
| N5—H5B···Br4 <sup>v</sup>     | 0.91            | 2.45              | 3.321 (16)                | 161.5                       |
| N7—H7A···N2 <sup>vii</sup>    | 0.91            | 2.14              | 3.04 (2)                  | 168.9                       |
| N7—H7B···Br2 <sup>vii</sup>   | 0.91            | 2.89              | 3.549 (17)                | 130.6                       |
| N7—H7B···Br3 <sup>vii</sup>   | 0.91            | 2.85              | 3.396 (14)                | 120.0                       |
| N2—H2D···Br4 <sup>vi</sup>    | 0.88            | 2.74              | 3.409 (16)                | 133.4                       |
| N2—H2E···Br4 <sup>viii</sup>  | 0.88            | 2.53              | 3.395 (15)                | 165.2                       |

Symmetry code(s): (i)  $-x+1, -y+1, -z$ ; (ii)  $-x+1, -y+1, -z+1$ ; (iii)  $-x+1/2, -y+1, z+1/2$ ; (iv)  $-x+1/2, -y+1, z-1/2$ ; (v)  $-x+1, y+1/2, -z+1/2$ ; (vi)  $x, -y+1/2, z+1/2$ ; (vii)  $x+1, y, z$ ; (viii)  $-x, y+1/2, -z+1/2$ .

**Table S5.** Selected hydrogen-bond parameters of MHy<sub>2</sub>PbBr<sub>2.9</sub>I<sub>1.1</sub>.

| <i>D</i> —H··· <i>A</i>        | <i>D</i> —H (Å) | H··· <i>A</i> (Å) | <i>D</i> ··· <i>A</i> (Å) | <i>D</i> —H··· <i>A</i> (°) |
|--------------------------------|-----------------|-------------------|---------------------------|-----------------------------|
| <b>Phase III, 295 K</b>        |                 |                   |                           |                             |
| N3A—H3AA···Br3 <sup>i</sup>    | 0.90            | 2.66              | 3.329 (12)                | 132.0                       |
| N3A—H3AB···Br3                 | 0.90            | 2.77              | 3.604 (18)                | 154.4                       |
| N2A—H2AA···Br3 <sup>ii</sup>   | 0.89            | 2.61              | 3.309 (11)                | 136.2                       |
| N2A—H2AB···N3A <sup>iii</sup>  | 0.89            | 2.24              | 3.105 (18)                | 165.7                       |
| N3—H3B···Br3 <sup>iv</sup>     | 0.89            | 2.78              | 3.62 (3)                  | 159.8                       |
| N2—H2A···Br1 <sup>ii</sup>     | 0.89            | 2.82              | 3.43 (3)                  | 127.2                       |
| N2—H2B···Br3 <sup>ii</sup>     | 0.89            | 2.71              | 3.52 (2)                  | 151.7                       |
| <b>Phase V, 100 K</b>          |                 |                   |                           |                             |
| N24—H24A···Br9 <sup>ii</sup>   | 0.90            | 2.74              | 3.52 (3)                  | 144.3                       |
| N24—H24B···Br15                | 0.91            | 2.65              | 3.44 (4)                  | 145.3                       |
| N11—H11A···Br16                | 0.91            | 2.63              | 3.46 (4)                  | 151.3                       |
| N11—H11B···Br10                | 0.91            | 2.49              | 3.38 (4)                  | 164.5                       |
| N6—H6A···N8 <sup>v</sup>       | 0.90            | 2.49              | 3.24 (5)                  | 141.7                       |
| N6—H6B···Br10                  | 0.90            | 2.76              | 3.58 (4)                  | 152.5                       |
| N15—H15B···Br4 <sup>vi</sup>   | 0.90            | 2.73              | 3.52 (4)                  | 147.2                       |
| N8—H8A···Br10 <sup>v</sup>     | 0.91            | 2.79              | 3.46 (4)                  | 130.9                       |
| N8—H8A···N6 <sup>v</sup>       | 0.91            | 2.53              | 3.24 (5)                  | 135.2                       |
| N8—H8B···Br12                  | 0.91            | 2.47              | 3.33 (4)                  | 159.0                       |
| N23—H23A···Br9                 | 0.91            | 2.82              | 3.35 (3)                  | 118.5                       |
| N23—H23B···N21 <sup>ii</sup>   | 0.91            | 2.14              | 3.05 (6)                  | 176.0                       |
| N18—H18A···N15 <sup>i</sup>    | 0.89            | 2.32              | 3.15 (6)                  | 155.5                       |
| N18—H18B···Br15 <sup>ii</sup>  | 0.89            | 2.62              | 3.51 (5)                  | 172.0                       |
| N17—H17A···Br15 <sup>vii</sup> | 0.91            | 2.44              | 3.32 (3)                  | 162.8                       |
| N17—H17B···Br9                 | 0.91            | 2.77              | 3.57 (5)                  | 147.3                       |
| N2—H2A···N12 <sup>v</sup>      | 0.91            | 2.10              | 3.00 (6)                  | 172.6                       |
| N2—H2B···Br3                   | 0.91            | 2.74              | 3.58 (4)                  | 155.0                       |
| N9—H9A···Br13 <sup>viii</sup>  | 0.90            | 2.58              | 3.48 (4)                  | 170.5                       |
| N5—H5A···Br16 <sup>vii</sup>   | 0.91            | 2.91              | 3.42 (3)                  | 116.6                       |
| N5—H5B···N3 <sup>ix</sup>      | 0.91            | 2.20              | 3.10 (5)                  | 169.7                       |
| N20—H20A···N18 <sup>ii</sup>   | 0.91            | 2.03              | 2.93 (6)                  | 174.1                       |
| N20—H20B···Br17                | 0.91            | 2.78              | 3.60 (4)                  | 150.1                       |
| N12—H12A···N9 <sup>v</sup>     | 0.92            | 2.40              | 3.29 (6)                  | 163.9                       |
| N12—H12B···Br10 <sup>v</sup>   | 0.92            | 2.62              | 3.52 (3)                  | 166.6                       |
| N14—H14A···Br15 <sup>ii</sup>  | 0.91            | 2.73              | 3.43 (4)                  | 134.9                       |
| N14—H14A···N24 <sup>ii</sup>   | 0.91            | 2.37              | 3.10 (5)                  | 137.0                       |
| N14—H14B···Br1                 | 0.91            | 2.51              | 3.38 (4)                  | 161.5                       |
| N21—H21A···Br1                 | 0.91            | 2.52              | 3.42 (5)                  | 170.1                       |
| N21—H21B···Br1 <sup>vi</sup>   | 0.90            | 2.69              | 3.41 (4)                  | 138.3                       |

Symmetry code(s): (i)  $-x+1, -y+1, -z$ ; (ii)  $-x+1, -y+1, -z+1$ ; (iii)  $-x+1/2, -y+1, z+1/2$ ; (iv)  $x-1/2, y, -z+1/2$ ; (v)  $-x+1, -y, -z+1$ ; (vi)  $-x, -y+1, -z+1$ ; (vii)  $x, y, z-1$ ; (viii)  $-x, -y, -z+1$ ; (ix)  $-x+1, -y, -z$ .

**Table S6.** Raman wavenumbers for polycrystalline MHy<sub>2</sub>PbBr<sub>4-x</sub>I<sub>x</sub> samples, together with band assignments.<sup>a</sup>

| 4                    | 3.1                  | 2.5                  | 2.35                 | 1.1                  | 0.4                                      | 0.3                                      | 0.25                                     | 0                                        | Assignment                                      |
|----------------------|----------------------|----------------------|----------------------|----------------------|------------------------------------------|------------------------------------------|------------------------------------------|------------------------------------------|-------------------------------------------------|
| 3270 <sub>vw</sub>   |                      |                      |                      |                      | 3283 <sub>vw</sub>                       |                                          | 3278 <sub>vw</sub>                       | 3279 <sub>vw</sub>                       | v <sub>as</sub> NH <sub>2</sub>                 |
| 3235 <sub>w</sub>    | 3240 <sub>w</sub>    | 3243 <sub>w</sub>    | 3238 <sub>w</sub>    | 3244 <sub>w</sub>    | 3247 <sub>w</sub>                        | 3248 <sub>w</sub>                        | 3246 <sub>w</sub>                        | 3247 <sub>w</sub>                        | v <sub>s</sub> NH <sub>2</sub>                  |
| 3163 <sub>w</sub>    | 3160 <sub>w</sub>    | 3165 <sub>w</sub>    | 3159 <sub>w</sub>    | 3162 <sub>w</sub>    | 3164 <sub>w</sub>                        | 3166 <sub>w</sub>                        | 3168 <sub>w</sub>                        | 3167 <sub>w</sub>                        | v <sub>as</sub> NH <sub>2</sub> <sup>+</sup>    |
| 3078 <sub>w</sub>    |                      |                      | 3079 <sub>w</sub>    | 3085 <sub>w</sub>    | 3090 <sub>w</sub>                        | 3091 <sub>w</sub>                        | 3089 <sub>w</sub>                        | 3087 <sub>w</sub>                        | v <sub>s</sub> NH <sub>2</sub> <sup>+</sup>     |
| 3025 <sub>w</sub>    | 3025 <sub>w</sub>    | 3025 <sub>w</sub>    | 3026 <sub>w</sub>    | 3028 <sub>w</sub>    | 3036 <sub>w</sub> ,<br>3028 <sub>w</sub> | 3036 <sub>w</sub> ,<br>3029 <sub>w</sub> | 3036 <sub>w</sub> ,<br>3029 <sub>w</sub> | 3038 <sub>w</sub> ,<br>3029 <sub>w</sub> | v <sub>as</sub> CH <sub>3</sub>                 |
| 2948 <sub>s</sub>    | 2953 <sub>s</sub>    | 2951 <sub>s</sub>    | 2952 <sub>s</sub>    | 2954 <sub>s</sub>    | 2957 <sub>s</sub>                        | 2956 <sub>s</sub>                        | 2955 <sub>s</sub>                        | 2955 <sub>s</sub>                        | v <sub>s</sub> CH <sub>3</sub>                  |
| 2876 <sub>vw</sub> , | 2883 <sub>vw</sub> , | 2882 <sub>vw</sub> , | 2878 <sub>vw</sub> , | 2880 <sub>vw</sub> , | 2881 <sub>vw</sub> ,                     | 2880 <sub>vw</sub> ,                     | 2880 <sub>vw</sub> ,                     | 2880 <sub>vw</sub> ,                     | overtone                                        |
| 2805 <sub>w</sub>    | 2808 <sub>w</sub>    | 2806 <sub>w</sub>    | 2807 <sub>w</sub>    | 2809 <sub>w</sub>    | 2809 <sub>w</sub>                        | 2809 <sub>w</sub>                        | 2809 <sub>w</sub>                        | 2809 <sub>w</sub>                        |                                                 |
| 1607 <sub>w</sub>    | 1601 <sub>w</sub>    | 1602 <sub>w</sub>    | 1611 <sub>w</sub>    | 1609 <sub>w</sub>    | 1615 <sub>w</sub>                        | 1617 <sub>vw</sub>                       | 1614 <sub>w</sub>                        | 1615 <sub>w</sub>                        | δNH <sub>2</sub>                                |
| 1568 <sub>m</sub>    | 1572 <sub>m</sub>    | 1571 <sub>m</sub>    | 1575 <sub>m</sub>    | 1577 <sub>m</sub>    | 1579 <sub>m</sub>                        | 1584 <sub>m</sub>                        | 1579 <sub>m</sub>                        | 1580 <sub>m</sub>                        | δNH <sub>2</sub> <sup>+</sup>                   |
| 1446 <sub>s</sub>    | 1445 <sub>s</sub>    | 1446 <sub>s</sub>    | 1448 <sub>s</sub>    | 1448 <sub>s</sub>    | 1451 <sub>s</sub>                        | 1452 <sub>s</sub>                        | 1450 <sub>s</sub>                        | 1451 <sub>s</sub>                        | δ <sub>as</sub> CH <sub>3</sub>                 |
| 1411 <sub>w</sub>    | 1417 <sub>w</sub>    | 1414 <sub>w</sub>    | 1414 <sub>w</sub>    | 1415 <sub>w</sub>    | 1415 <sub>w</sub>                        | 1417 <sub>vw</sub>                       | 1416 <sub>w</sub>                        | 1414 <sub>w</sub>                        | δ <sub>s</sub> CH <sub>3</sub>                  |
| 1357 <sub>m</sub>    | 1364 <sub>m</sub>    | 1363 <sub>m</sub>    | 1364 <sub>m</sub>    | 1367 <sub>m</sub>    | 1365 <sub>m</sub>                        | 1374 <sub>w</sub>                        | 1365 <sub>m</sub>                        | 1361 <sub>m</sub>                        | ωNH <sub>2</sub> <sup>+</sup>                   |
| 1322 <sub>m</sub>    | 1313 <sub>m</sub>    | 1319 <sub>m</sub>    | 1328 <sub>m</sub>    | 1326 <sub>m</sub>    | 1325 <sub>m</sub>                        | 1327 <sub>m</sub>                        | 1324 <sub>m</sub>                        | 1321 <sub>m</sub>                        | τNH <sub>2</sub> <sup>+</sup>                   |
| 1196 <sub>w</sub>    | 1197 <sub>w</sub>    | 1198 <sub>w</sub>    | 1198 <sub>w</sub>    | 1200 <sub>w</sub>    | 1201 <sub>w</sub>                        | 1203 <sub>w</sub>                        | 1201 <sub>w</sub>                        | 1202 <sub>w</sub>                        | ρCH <sub>3</sub> +ωNH <sub>2</sub>              |
| 1135 <sub>m</sub>    | 1135 <sub>m</sub>    | 1136 <sub>m</sub>    | 1139 <sub>m</sub>    | 1139 <sub>m</sub>    | 1140 <sub>m</sub>                        | 1140 <sub>m</sub>                        | 1140 <sub>m</sub>                        | 1139 <sub>m</sub>                        | τNH <sub>2</sub> <sup>+</sup> +ρCH <sub>3</sub> |
| 1090 <sub>w</sub>    | 1090 <sub>w</sub>    | 1094 <sub>w</sub>    | 1096 <sub>w</sub>    | 1097 <sub>w</sub>    | 1098 <sub>w</sub>                        | 1099 <sub>m</sub>                        | 1098 <sub>w</sub>                        | 1098 <sub>w</sub>                        | ρCH <sub>3</sub> +τNH <sub>2</sub> <sup>+</sup> |
| 976 <sub>w</sub>     | 971 <sub>w</sub>     | 976 <sub>w</sub>     | 984 <sub>w</sub>     | 985 <sub>w</sub>     | 989 <sub>w</sub>                         | 985 <sub>w</sub>                         | 989 <sub>w</sub>                         | 989 <sub>w</sub>                         | v <sub>as</sub> CNN                             |
| 882 <sub>s</sub>     | 880 <sub>s</sub>     | 883 <sub>s</sub>     | 887 <sub>s</sub>     | 888 <sub>s</sub>     | 891 <sub>s</sub>                         | 894 <sub>s</sub>                         | 891 <sub>s</sub>                         | 892 <sub>s</sub>                         | v <sub>s</sub> CNN                              |
| 856 <sub>sh</sub>    | 866 <sub>sh</sub>    | 868 <sub>sh</sub>    | 871 <sub>sh</sub>    | 872 <sub>sh</sub>    | 872 <sub>sh</sub>                        | 872 <sub>sh</sub>                        | 873 <sub>m</sub>                         | 872 <sub>sh</sub>                        | ρNH <sub>2</sub> <sup>+</sup>                   |
| 441 <sub>w</sub>     | 439 <sub>w</sub>     | 441 <sub>w</sub>     | 446 <sub>w</sub>     | 444 <sub>w</sub>     | 449 <sub>w</sub>                         | 451 <sub>w</sub>                         | 448 <sub>w</sub>                         | 450 <sub>w</sub>                         | δCNN                                            |
| 331 <sub>w</sub>     |                      | 347 <sub>w</sub>     | 340 <sub>w</sub>     | 349 <sub>w</sub>     | 347 <sub>w</sub>                         | 342 <sub>w</sub>                         |                                          | 346 <sub>w</sub>                         | τNH <sub>2</sub>                                |
| 225 <sub>vw</sub>    |                      | 241 <sub>vw</sub>    | 255 <sub>vw</sub>    | 259 <sub>vw</sub>    | 295 <sub>vw</sub>                        | 285 <sub>vw</sub>                        | 295 <sub>vw</sub>                        | 295 <sub>vw</sub>                        | τCH <sub>3</sub>                                |
| 122 <sub>s</sub>     | 107 <sub>s</sub>     | 129 <sub>s</sub>     | 107 <sub>s</sub>     | 116 <sub>s</sub>     | 122 <sub>s</sub>                         | 119 <sub>s</sub>                         | 121 <sub>s</sub>                         | 123 <sub>s</sub>                         | vPbBr+T'+L                                      |
|                      | 58 <sub>vs</sub>     |                      | 57 <sub>vs</sub>     | 58 <sub>vs</sub>     | 57 <sub>vs</sub>                         |                                          | 57 <sub>vs</sub>                         | 56 <sub>vs</sub>                         | δPbBr                                           |

<sup>a</sup>key: δ, bending; ρ, rocking; v, stretching; τ, twisting; ω, wagging; T', MHy<sup>+</sup> translation; L, MHy<sup>+</sup> vibration; vs, very strong; s, strong or symmetric; m, medium; w, weak; vw, very weak; as, antisymmetric.
